# Supplementary material
Source: bioRxiv or medRxiv preprint supplement (https://www.medrxiv.org/highwire/filestream/78234/field_highwire_adjunct_files/0/19011361-1.pdf)
Supplement: Supplementary file [file 19011361-1.pdf]

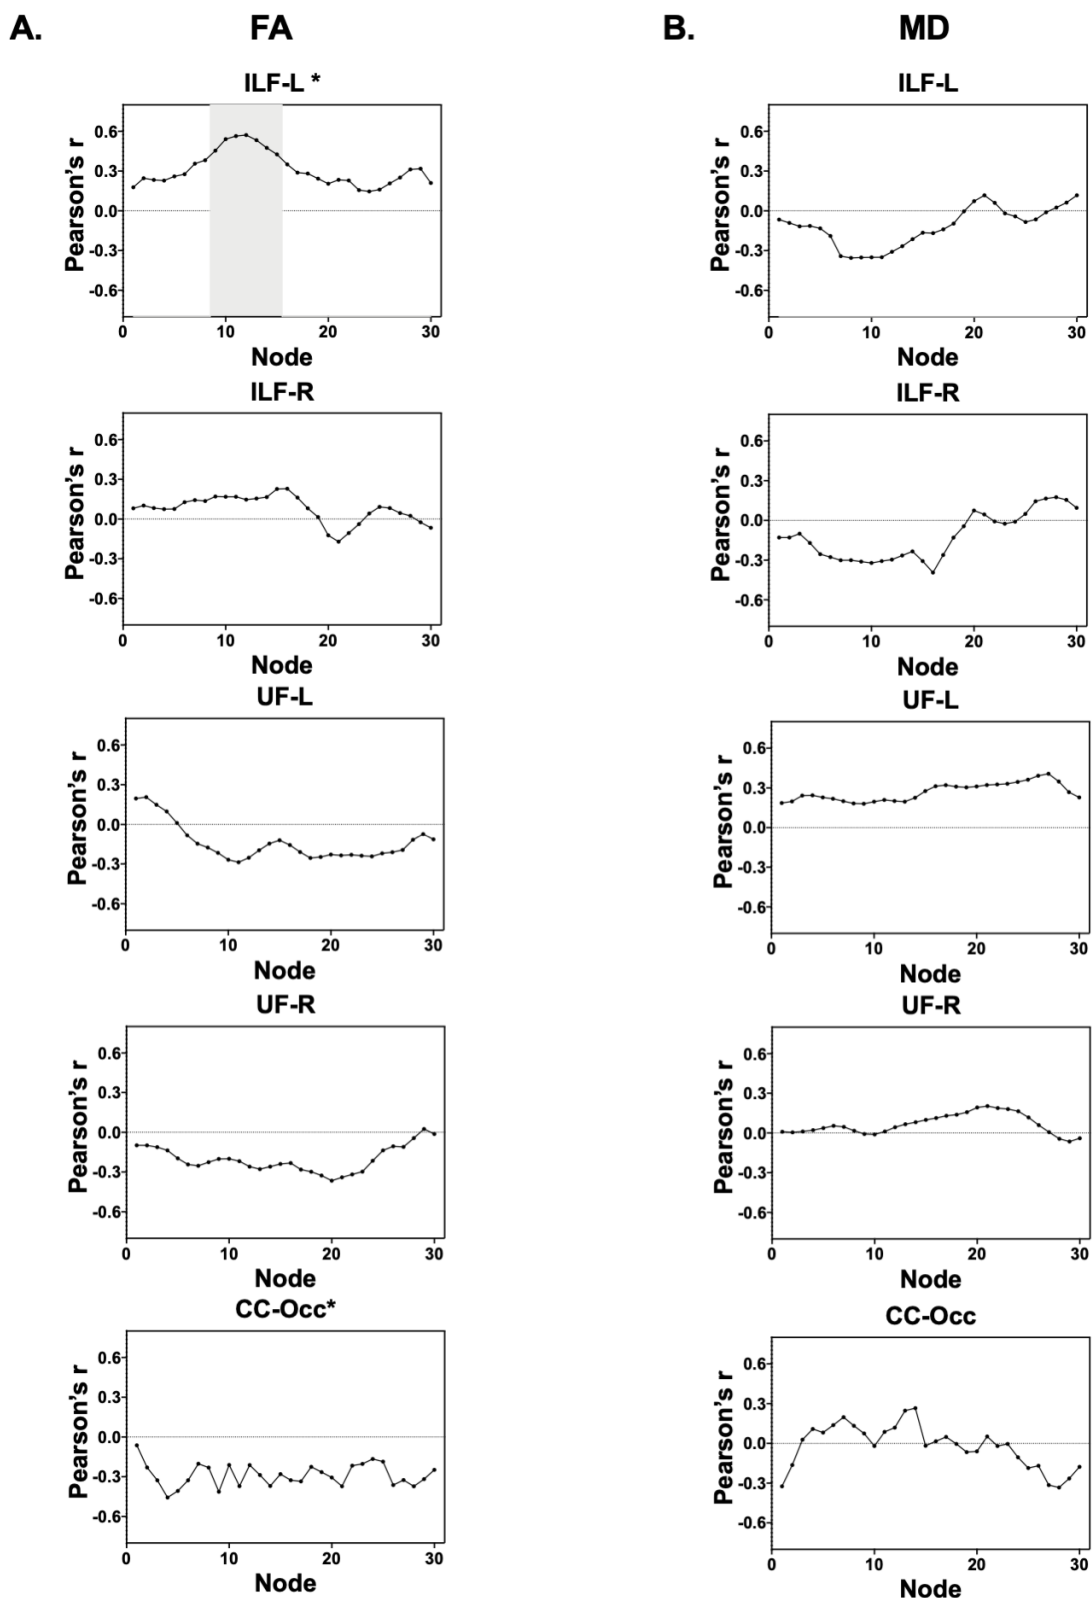

**Figure S1. Tract Profile FA and MD correlations with language.** Pearson correlations between Bayley Scales of Infant Development, 3<sup>rd</sup> Edition composite language scores and (A) tract profile FA and (B) tract profile MD are shown for each of the cerebral tracts depicted in Fig 1. Pearson's  $r$  coefficients are plotted for 30 equidistant nodes between the two ROIs used to isolate the core of each tract as depicted in Figure 1. Tracts with correlations between mean tract FA or MD and language with 95% confidence intervals that do not include zero (as shown in Table 4) are indicated with an \*. Shaded gray background indicates a tract segment where the correlation is significant after correction for multiple comparisons within the tract. ILF = inferior longitudinal fasciculus; UF = uncinate fasciculus; CC-Occ = occipital segment of the corpus callosum.
